# Supplementary material for: Positional isomeric effects of coupling agents on the temperature-induced gelation of triblock copolymer aqueous solutions
Source: Royal Society of Chemistry journal article supplement (doi:10.1039/c7py00232g), 2017-01-01
Supplement: c7py00232g1.pdf [file c7py00232g1.pdf]

## **Electronic Supplementary Information**

# Positional isomeric effects of coupling agents on the temperature-induced gelation of triblock copolymer aqueous solutions

*Jiabin Luan, Shuquan Cui, Juntao Wang, Wenjia Shen, Lin Yu\* and Jiandong Ding*

State Key Laboratory of Molecular Engineering of Polymers, Department of Macromolecular Science, Fudan University, Shanghai 200433, China

### **Corresponding Author**

\* E-mail: [yu\\_lin@fudan.edu.cn](mailto:yu_lin@fudan.edu.cn) (L. Y.)

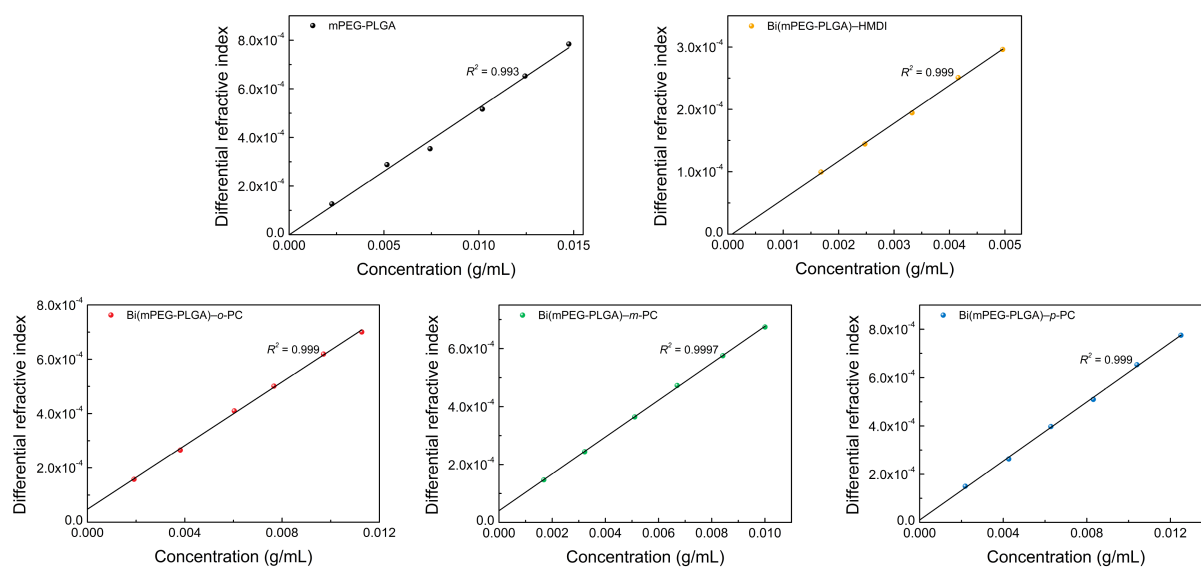

**Fig. S1**  $dn/dc$  results of the indicated samples measured by a refractive index detector in THF.

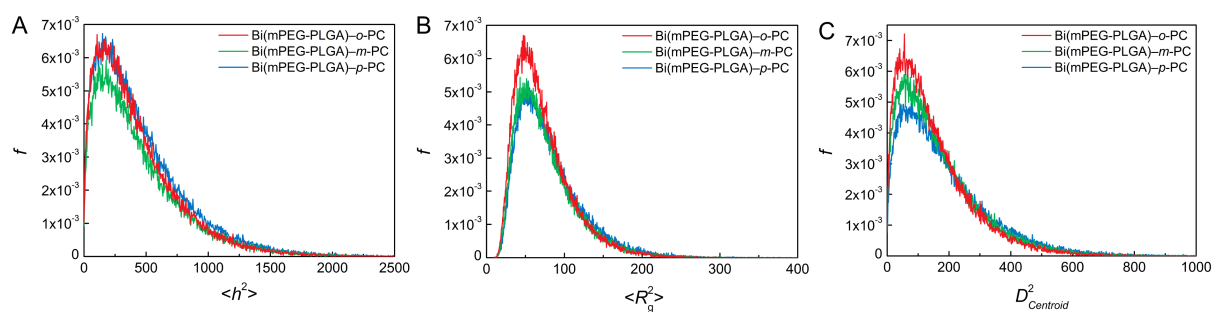

**Fig. S2** Configurational distribution of single chains from Monte Carlo simulation. (A) Mean-squared end-to-end distance  $\langle h^2 \rangle$ , (B) mean-squared radius of gyration  $\langle R_g^2 \rangle$  and (C) mean-squared distance between two side blocks  $\langle D_{Centroid}^2 \rangle$ . The statistics was made over 100,000 chain configurations.

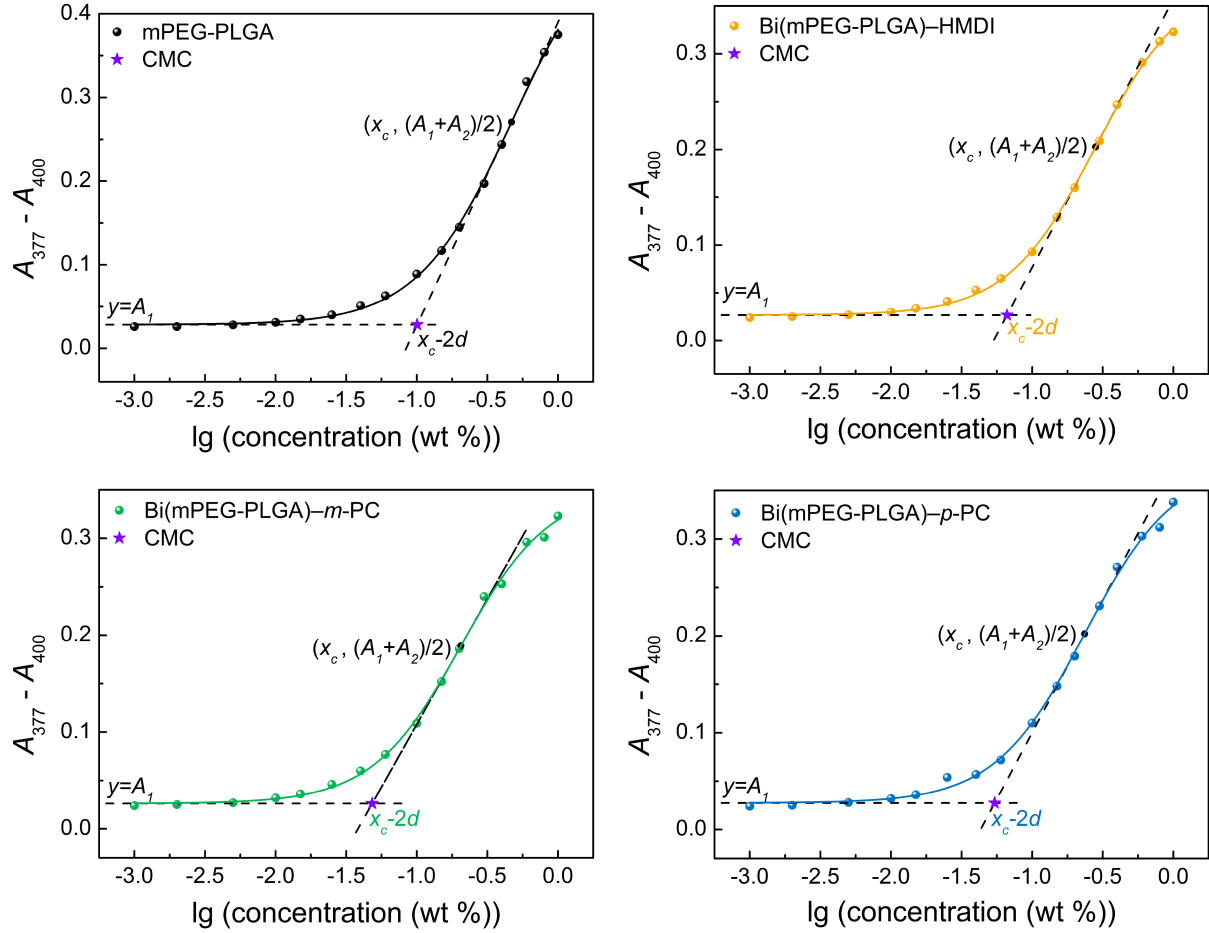

**Fig. S3** CMC determination of the indicated copolymer aqueous solutions by fitting the data with a Boltzmann sigmoid, where  $y$  represents the absorbance difference ( $A_{377} - A_{400}$ ),  $x$  is the logarithm of polymer concentration,  $A_1$  and  $A_2$  represent the asymptotic values of  $y$  at infinitely small and large  $x$ ,  $x_c$  is the value at the center of the Boltzmann sigmoid,  $d$  measures the deviation of  $x$  around  $x_c$ , respectively. CMC was obtained from the turning point.

**Table S1** Parameters of the CMC measurements using Boltzmann fitting.

| Sample                      | $x_c$    | $d$    | $x_c - 2d$ | $R^2$ | CMC<br>(wt %) |
|-----------------------------|----------|--------|------------|-------|---------------|
| mPEG-PLGA                   | -0.3288  | 0.3343 | -0.9974    | 0.999 | 0.101         |
| Bi(mPEG-PLGA)-HMDI          | -0.5505  | 0.3139 | -1.1783    | 0.999 | 0.066         |
| Bi(mPEG-PLGA)- <i>o</i> -PC | -0.5813  | 0.3340 | -1.2493    | 0.998 | 0.056         |
| Bi(mPEG-PLGA)- <i>m</i> -PC | -0.6873  | 0.3143 | -1.3159    | 0.998 | 0.048         |
| Bi(mPEG-PLGA)- <i>p</i> -PC | -0.62831 | 0.3186 | -1.2655    | 0.998 | 0.054         |
